# Supplementary material
Source: HighWire-hosted journal article supplement (http://www.qdcxjkg.com/highwire/filestream/126480/field_highwire_adjunct_files/0/supplement_4.pdf)
Supplement: supplement_4.pdf [file supplement_4.pdf]

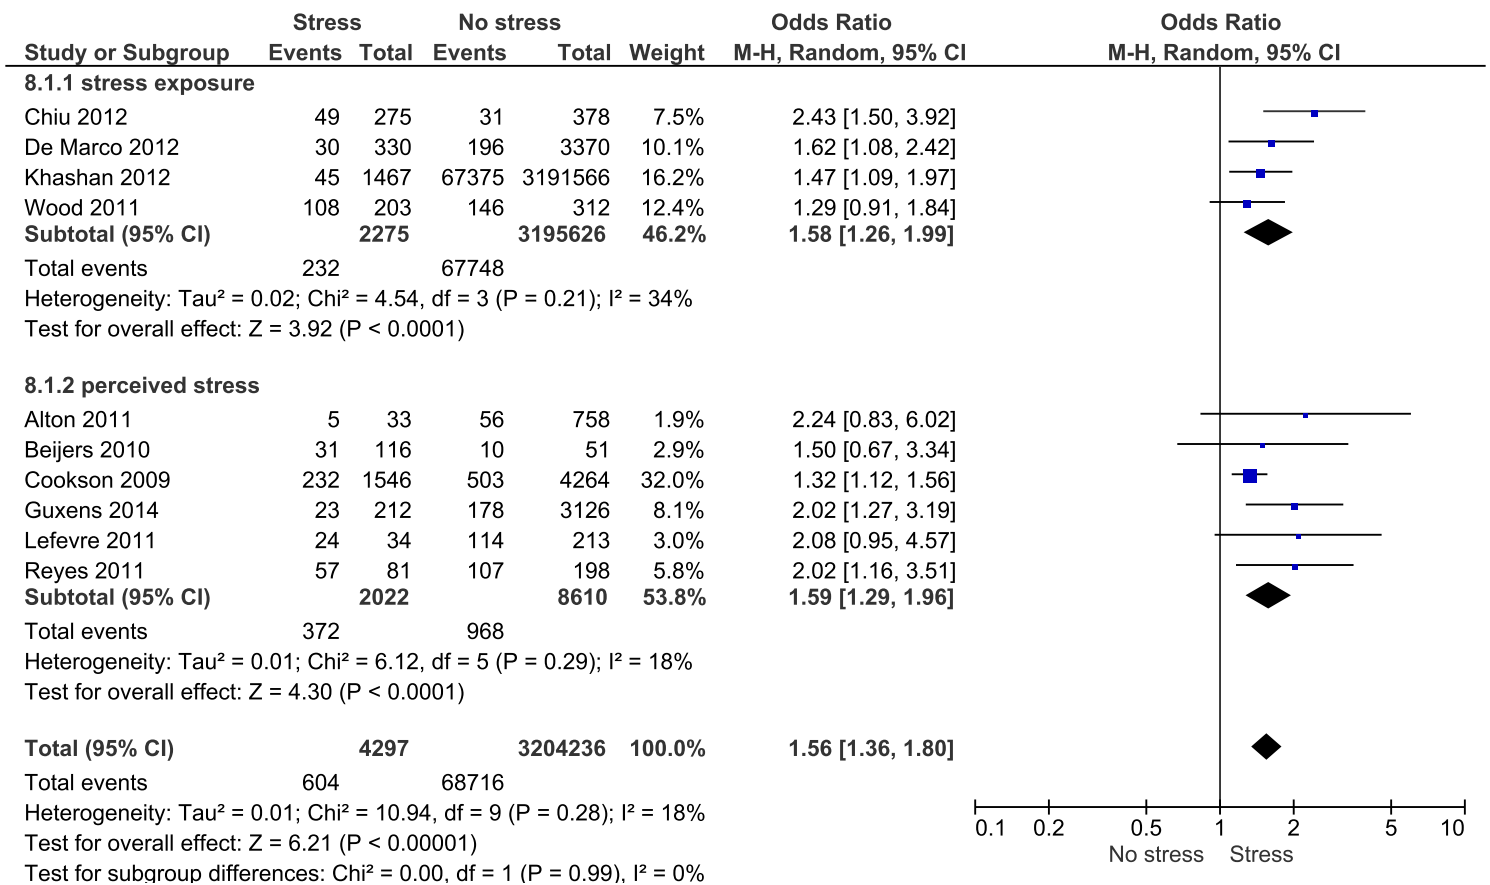

**S4:** Forest plot of the meta-analysis (dichotomous measures) on the association between any form of prenatal maternal psychological stress and respiratory morbidity in childhood, stratified by stress exposure versus perceived stress.
